# Supplementary material
Source: ML conference proceedings conference paper supplement (https://proceedings.neurips.cc/paper_files/paper/2020/hash/9a96876e2f8f3dc4f3cf45f02c61c0c1-Abstract.html)
Supplement: Supplementary file [file 9a96876e2f8f3dc4f3cf45f02c61c0c1-Supplemental.pdf]

## A Useful Definitions & Theorems

Throughout this paper, we use the following standard Chernoff bounds.

**Lemma 22** (Absolute Chernoff Bound). *Let  $X_1, \dots, X_n$  be i.i.d. binary random variables with  $\mathbb{E}[X_i] = \mu$  for all  $i \in [n]$ . Then, for any  $\epsilon > 0$ :  $\Pr\left[\left|\frac{1}{n} \sum_{i=1}^n X_i - \mu\right| \geq \epsilon\right] \leq 2 \exp(-2\epsilon^2 n)$ .*

**Lemma 23** (Relative Chernoff Bound). *Let  $X_1, \dots, X_n$  be i.i.d. binary random variables and let  $X$  denote their sum. Then, for any  $\epsilon \in (0, 1)$ :  $\Pr[X \leq (1 - \epsilon) \mathbb{E}[X]] \leq \exp(-\epsilon^2 \mathbb{E}[X]/2)$ .*

Next, the definition of Vapnik–Chervonenkis dimension, following by Uniform convergence for statistical learning and the Fundamental Theorem of Statistical Learning.

**Definition 24.** [VC-dimension] *Let  $\mathcal{H} \subseteq \{0, 1\}^{\mathcal{X}}$  be a hypothesis class. A subset  $S = \{x_1, \dots, x_{|S|}\} \subseteq \mathcal{X}$  is shattered by  $\mathcal{H}$  if:  $|\{(h(x_1), \dots, h(x_{|S|})) : h \in \mathcal{H}\}| = 2^{|S|}$ . The VC-dimension of  $\mathcal{H}$ , denoted  $VCdim(\mathcal{H})$ , is the maximal cardinality of a subset  $S \subseteq \mathcal{X}$  shattered by  $\mathcal{H}$ .*

**Definition 25** (Uniform convergence for statistical learning). *Let  $\mathcal{H} \subseteq \mathcal{Y}^{\mathcal{X}}$  be a hypothesis class. We say that  $\mathcal{H}$  has the uniform convergence property w.r.t. loss function  $\ell$  if there exists a function  $m_{\mathcal{H}}^{sl}(\epsilon, \delta) \in \mathbb{N}$  such that for every  $\epsilon, \delta \in (0, 1)$  and for every probability distribution  $D$  over  $\mathcal{X} \times \{0, 1\}$ , if  $S$  is a sample of  $m \geq m_{\mathcal{H}}^{sl}(\epsilon, \delta)$  examples drawn i.i.d. from  $D$ , then, with probability of at least  $1 - \delta$ , for every  $h \in \mathcal{H}$ , the difference between the risk and the empirical risk is at most  $\epsilon$ . Namely, with probability  $1 - \delta$ ,  $\forall h \in \mathcal{H} : |L_S(h) - L_D(h)| \leq \epsilon$ .*

**Theorem 26.** [The Fundamental Theorem of Statistical Learning] *Let  $\mathcal{H} \subseteq \{0, 1\}^{\mathcal{X}}$  be a binary hypothesis class with  $VCdim(\mathcal{H}) = d$  and let the loss function,  $\ell$ , be the 0–1 loss. Then,  $\mathcal{H}$  has the uniform convergence property with sample complexity  $m_{\mathcal{H}}^{UC}(\epsilon, \delta) = \Theta\left(\frac{1}{\epsilon^2} (d + \log(1/\delta))\right)$ .*

## B Proofs for Section 4

*Proof.* (Proof of Theorem 9)

Let  $S^m = \{(x_1, y_1), \dots, (x_m, y_m)\}$  be a random sample of size  $m \geq m_{\mathcal{H}}(\epsilon, \delta, \psi, \gamma, \lambda)$  labeled examples drawn i.i.d. according to  $D$ .

For convenience, throughout the proof we use the following notations. We first define the quantities with respect to the distribution. For a given hypothesis  $h \in H$ , group  $U \in \Gamma$  and interval  $I \in \Lambda$ , we are interested in the subpopulation which belongs to  $U$  and for which  $h$  prediction is in  $I$ , i.e.,  $[x \in U, h(x) \in I]$ . For this subpopulation we define:  $p(h, U, I)$  the probability of being in this subpopulation,  $\mu_y(h, U, I)$  the average  $y$  value in the subpopulation, and  $\mu_h(h, U, I)$ , the average prediction, i.e.,  $h(x)$ . The three measures are with respect to the true distribution  $D$ . Formally,

$$\begin{aligned} p(h, U, I) &:= \Pr_D[x \in U, h(x) \in I] \\ \mu_y(h, U, I) &:= \mathbb{E}_D[y \mid x \in U, h(x) \in I] \\ \mu_h(h, U, I) &:= \mathbb{E}_D[h(x) \mid x \in U, h(x) \in I] \end{aligned}$$

Similarly we denote the three empirical quantities with respect to the sample. Namely, we denote by  $\hat{n}(h, U, I, S)$ ,  $\hat{\mu}_y(h, U, I, S)$  and  $\hat{\mu}_h(h, U, I, S)$  the number of samples, empirical outcome and empirical prediction, of the subpopulation  $[x \in U, h(x) \in I]$ . Formally,

$$\begin{aligned} \hat{n}(h, U, I, S) &:= \sum_{i=1}^m \mathbb{I}[x_i \in U, h(x_i) \in I] \\ \hat{\mu}_y(h, U, I, S) &:= \sum_{i=1}^m \frac{\mathbb{I}[x_i \in U, h(x_i) \in I]}{\hat{n}(h, I, U, S)} y_i \\ \hat{\mu}_h(h, U, I, S) &:= \sum_{i=1}^m \frac{\mathbb{I}[x_i \in U, h(x_i) \in I]}{\hat{n}(h, I, U, S)} h(x_i) \end{aligned}$$

Then, the calibration error and the empirical calibration error can be expressed as:

$$\begin{aligned} c(h, U, I) &= \mu_y(h, U, I) - \mu_h(h, U, I) \\ \hat{c}(h, U, I, S) &= \hat{\mu}_y(h, U, I, S) - \hat{\mu}_h(h, U, I, S) \end{aligned}$$

Let  $C_h$  denote the collection of all interesting categories according to predictor  $h$ , namely,

$$C_h := \left\{ (U, I) : U \in \Gamma, I \in \Lambda, \Pr_D[x \in U] \geq \gamma, \Pr_D[h(x) \in I \mid x \in U] \geq \psi \right\}$$

Note that every interesting category  $(U, I) \in C_h$  has a probability of at least  $\gamma\psi$ , namely, for every  $h \in \mathcal{H}$  and for any interesting category  $(U, I) \in C_h$ :

$$\Pr_{x \sim D}[x \in U, h(x) \in I] = \Pr_{x \sim D}[h(x) \in I \mid x \in U] \cdot \Pr_{x \sim D}[x \in U] \geq \gamma\psi$$

We define a “bad” event  $B^m$  over the samples, as the event there exist some predictor and some interesting category for which the generalization error is larger than  $\epsilon$ .

$$B^m := \left\{ S \in (\mathcal{X} \times \{0, 1\})^m : \exists h \in \mathcal{H}, \exists (U, I) \in C_h : |\hat{c}(h, U, I, S) - c(h, U, I)| > \epsilon \right\}$$

Bounding the probability that  $S^m \in B^m$  by  $\delta$  implies the theorem. In order to do so, we would like to have a “large enough” induced sample in every interesting category. For this purpose, we define the “good” event,  $G^{m,l}$ , as the event that indicates that for every predictor, each interesting category has at least  $l$  samples.

$$G^{m,l} := \left\{ S \in (\mathcal{X} \times \{0, 1\})^m : \forall h \in \mathcal{H}, \forall (U, I) \in C_h : \hat{n}(h, U, I, S) \geq l \right\}$$

We will later set  $l$  to achieve  $\epsilon$ -accurate approximation with confidence  $\delta$  later. Note that  $G^{m,l}$  is not the complement of  $B^m$ .

According to the law of total probability the following holds:

$$\begin{aligned} \Pr[B^m] &= \Pr[B^m \mid G^{m,l}] \Pr[G^{m,l}] + \Pr[B^m \mid \overline{G^{m,l}}] \Pr[\overline{G^{m,l}}] \\ &\leq \Pr[B^m \mid G^{m,l}] + \Pr[\overline{G^{m,l}}] \end{aligned}$$

We would like to bound each of the probabilities  $\Pr[B^m \mid G^{m,l}]$  and  $\Pr[\overline{G^{m,l}}]$  by  $\delta/2$ , in order to bound the probability of  $B^m$  by  $\delta$ . We start by bounding  $\Pr[S^m \in B^m \mid S^m \in G^{m,l}]$ . By using the union bound:

$$\begin{aligned} &\Pr[S^m \in B^m \mid S^m \in G^{m,l}] \\ &= \Pr\left[\exists h \in \mathcal{H}, \exists (U, I) \in C_h : |\hat{c}(h, U, I, S^m) - c(h, U, I)| > \epsilon \mid \forall h \in \mathcal{H}, \forall (U, I) \in C_h : \hat{n}(h, U, I, S^m) \geq l\right] \\ &\leq \sum_{h \in \mathcal{H}} \sum_{(U, I) \in C_h} \Pr\left[|\hat{c}(h, U, I, S^m) - c(h, U, I)| > \epsilon \mid \forall h \in \mathcal{H}, \forall (U, I) \in C_h : \hat{n}(h, U, I, S^m) \geq l\right] \\ &= \sum_{h \in \mathcal{H}} \sum_{(U, I) \in C_h} \Pr\left[|\hat{c}(h, U, I, S^m) - c(h, U, I)| > \epsilon \mid \hat{n}(h, U, I, S^m) \geq l\right] \end{aligned}$$

By using the triangle inequality:

$$\begin{aligned} &\sum_{h \in \mathcal{H}} \sum_{(U, I) \in C_h} \Pr\left[|\hat{c}(h, U, I, S^m) - c(h, U, I)| > \epsilon \mid \hat{n}(h, U, I, S^m) \geq l\right] \\ &= \sum_{h \in \mathcal{H}} \sum_{(U, I) \in C_h} \Pr\left[|\hat{\mu}_y(h, U, I, S^m) - \hat{\mu}_h(h, U, I, S^m) - \mu_y(h, U, I) + \mu_h(h, U, I)| > \epsilon \mid \hat{n}(h, U, I, S^m) \geq l\right] \\ &\leq \sum_{h \in \mathcal{H}} \sum_{(U, I) \in C_h} \Pr\left[|\hat{\mu}_h(h, U, I, S^m) - \mu_h(h, U, I)| + |\mu_y(h, U, I) - \hat{\mu}_y(h, U, I, S^m)| > \epsilon \mid \hat{n}(h, U, I, S^m) \geq l\right] \end{aligned}$$

Since  $a + b \geq \epsilon$  implies that either  $a \geq \epsilon/2$  or  $b \geq \epsilon/2$ :

$$\begin{aligned} & \sum_{h \in \mathcal{H}} \sum_{(U,I) \in C_h} \Pr \left[ |\hat{\mu}_h(h, U, I, S^m) - \mu_h(h, U, I)| + |\mu_y(h, U, I) - \hat{\mu}_y(h, U, I, S^m)| > \epsilon \mid \hat{n}(h, U, I, S^m) \geq l \right] \\ & \leq \sum_{h \in \mathcal{H}} \sum_{(U,I) \in C_h} \Pr \left[ |\hat{\mu}_h(h, U, I, S^m) - \mu_h(h, U, I)| > \frac{\epsilon}{2} \vee |\mu_y(h, U, I) - \hat{\mu}_y(h, U, I, S^m)| > \frac{\epsilon}{2} \mid \hat{n}(h, U, I, S^m) \geq l \right] \end{aligned}$$

And by using the union-bound once again:

$$\begin{aligned} & \sum_{h \in \mathcal{H}} \sum_{(U,I) \in C_h} \Pr \left[ |\hat{\mu}_h(h, U, I, S^m) - \mu_h(h, U, I)| > \frac{\epsilon}{2} \vee |\mu_y(h, U, I) - \hat{\mu}_y(h, U, I, S^m)| > \frac{\epsilon}{2} \mid \hat{n}(h, U, I, S^m) \geq l \right] \\ & \leq \sum_{h \in \mathcal{H}} \sum_{(U,I) \in C_h} \Pr \left[ |\hat{\mu}_h(h, U, I, S^m) - \mu_h(h, U, I)| > \frac{\epsilon}{2} \mid \hat{n}(h, U, I, S^m) \geq l \right] \\ & \quad + \Pr \left[ |\mu_y(h, U, I) - \hat{\mu}_y(h, U, I, S^m)| > \frac{\epsilon}{2} \mid \hat{n}(h, U, I, S^m) \geq l \right] \end{aligned}$$

We would like to use Chernoff inequality (Lemma 22) to bound the probability with a confidence of  $1 - \delta/2$ . However, in order to do so, we must fix the number of samples,  $\hat{n}(h, U, I, S^m)$ , that  $h$  maps to a certain category (rather than using a random variable). Note that for  $\hat{n}(h, U, I, S^m) \geq l$  the probability is maximized at  $\hat{n}(h, U, I, S^m) = l$ , so we will assume that  $\hat{n}(h, U, I, S^m) = l$ . We denote by  $S^l|_{(h,U,I)}$  the sub-sample with  $[x \in U, h(x) \in I]$ , and its size is  $l$ .

Now, in order to use Chernoff inequality, we define two random variables,  $\hat{Z}_y(h, U, I)$  and  $\hat{Z}_h(h, U, I)$ , as follows:

$$\begin{aligned} \hat{Z}_y(h, U, I) & := \frac{1}{l} \sum_{(x_i, y_i) \in S^l|_{(h,U,I)}} y_i \\ \hat{Z}_h(h, U, I) & := \frac{1}{l} \sum_{(x_i, y_i) \in S^l|_{(h,U,I)}} h(x_i) \end{aligned}$$

and we observe that

$$\begin{aligned} \mathbb{E} \left[ \hat{Z}_y(h, U, I) \right] & = \mu_y(h, U, I) \\ \mathbb{E} \left[ \hat{Z}_h(h, U, I) \right] & = \mu_h(h, U, I) \end{aligned}$$

Using this notation,

$$\begin{aligned} & \Pr [S^m \in B^m \mid S^m \in G^{m,l}] \\ & \leq \sum_{h \in \mathcal{H}} \sum_{(U,I) \in C_h} \left[ \Pr \left[ \left| \hat{Z}_y(h, U, I) - \mu_y(h, U, I) \right| > \frac{\epsilon}{2} \right] + \Pr \left[ \left| \hat{Z}_h(h, U, I) - \mu_h(h, U, I) \right| > \frac{\epsilon}{2} \right] \right] \\ & \leq \sum_{h \in \mathcal{H}} \sum_{(U,I) \in C_h} 4e^{-\frac{\epsilon^2}{2}l} \leq \frac{4|\Gamma||\mathcal{H}|}{\lambda} e^{-\frac{\epsilon^2}{2}l} \end{aligned}$$

We would like to set  $l$  so that  $\Pr [S^m \in B^m \mid S^m \in G^{m,l}]$  will be at most  $\delta/2$ , as follows,

$$\frac{4|\Gamma||\mathcal{H}|}{\lambda} e^{-\frac{\epsilon^2}{2}l} \leq \frac{\delta}{2} \iff l \geq \frac{2}{\epsilon^2} \log \left( \frac{8|\Gamma||\mathcal{H}|}{\delta\lambda} \right)$$

Hence, we set

$$l = \frac{2}{\epsilon^2} \log \left( \frac{8|\Gamma||\mathcal{H}|}{\delta\lambda} \right)$$

Next, we will bound  $\Pr[S^m \in \overline{G^{m,l}}]$  by  $\delta/2$ .

Since  $m \geq m_{\mathcal{H}}(\epsilon, \delta, \psi, \gamma, \lambda)$  and since  $p(h, U, I) \geq \gamma\psi$  for any  $h \in \mathcal{H}$  and  $(U, I) \in C_h$ , we know that for any  $h \in \mathcal{H}$  and  $(U, I) \in C_h$ :

$$m \geq \frac{4l}{\gamma\psi} = \frac{8 \log\left(\frac{8|\Gamma||\mathcal{H}|}{\delta\lambda}\right)}{\epsilon^2\gamma\psi}$$

Thus, the expected number of samples we have in each interesting category, is at least twice the value of  $l$ , i.e.,

$$\mathbb{E}[\hat{n}(h, U, I, S)] = mp(h, U, I) \geq m\gamma\psi \geq 2l$$

Thus, using the relative version of Chernoff bound, the upper bound we have on  $l$ , and the lower bound we have on  $m$ , for any  $h \in \mathcal{H}$  and for any interesting category  $(U, I) \in C_h$ , the probability that  $S^m$  has less than  $l$  samples in the category  $(U, I)$  is bounded by:

$$\Pr[\hat{n}(h, U, I, S) \leq l] \leq \Pr\left[\hat{n}(h, U, I, S) \leq \frac{\mathbb{E}[\hat{n}(h, U, I, S)]}{2}\right] \leq e^{-\frac{\mathbb{E}[\hat{n}(h, U, I, S)]}{8}} \leq \frac{\lambda\delta}{2|\Gamma||\mathcal{H}|}$$

And, by using the union bound:

$$\Pr[S^m \in \overline{G^{m,l}}] = \Pr[\exists h \in \mathcal{H}, \exists (U, I) \in C_h : \hat{n}(h, U, I, S) < l] \leq |C_h| \frac{\lambda\delta}{2|\Gamma|} \leq \frac{\delta}{2}$$

Thus, overall:

$$\Pr[S^m \in B^m] \leq \Pr[S^m \in B^m \mid S^m \in G^{m,l}] + \Pr[S^m \in \overline{G^{m,l}}] \leq \delta/2 + \delta/2 = \delta$$

as required. ■

## C Proofs for Section 5

*Proof.* (Proof of Lemma 16)

Let us assume that  $VCDim(\mathcal{H}_v) > d$  and let  $S$  be a sample of size  $d + 1$  such that  $\mathcal{H}_v$  shatters  $S$ .

Let us define the function  $f : S \rightarrow \mathcal{Y}$  as:

$$\forall x \in S : f(x) = v$$

Let  $T \subseteq S$  be an arbitrary subset of  $S$ . By assuming that  $\mathcal{H}_v$  shatters  $S$  we know that there exists  $h_v \in \mathcal{H}_v$  such that:

$$\forall x \in S : h_v(x) = 1 \iff x \in T$$

This means that for the corresponding predictor  $h \in \mathcal{H}$ :

$$\forall x \in S : h(x) = v = f(x) \iff x \in T$$

Thus, using our definition of  $f$ ,

$$\forall T \subseteq S, \exists h \in \mathcal{H}, \forall x \in S : h(x) = f(x) \iff x \in T$$

Which means that  $S$  is G-shattered by  $\mathcal{H}$ . However, since  $|S| > d$ , it is a contradiction to the assumption that  $d_G(\mathcal{H}) \leq d$ . ■

*Proof.* (Proof of Lemma 17)

Assume that  $VCDim(\Phi_{\mathcal{H}_v}) > d$  and let  $S$  be a sample of  $d + 1$  domain points and outcomes shattered by  $\Phi_{\mathcal{H}_v}$ .

Note that  $y = 0$  implies that  $\forall h_v \in \mathcal{H}_v, \forall x \in \mathcal{X} : \phi_{h_v}(x, y) = 0$ . Thus,  $\forall (x, y) \in S : y = 1$  (otherwise  $S$  cannot be shattered).

Let  $S_x = \{x_j : (x_j, y_j) \in S\}$ . Observe that when  $y = 1, \forall h_v \in \mathcal{H}_v, \forall x \in \mathcal{X} : \phi_{h_v}(x, 1) = h_v(x)$ . Thus, the fact that  $S$  is shattered by  $\Phi_{\mathcal{H}_v}$  implies that  $S_x$  is shattered by  $\mathcal{H}_v$ . However,  $|S_x| = d + 1$ . Thus, we have a contradiction to the assumption that  $VCDim(\Phi_{\mathcal{H}_v}) > d$ . ■

*Proof.* (Proof of Lemma 18)

Let  $\mathcal{H}_v$  and  $\Phi_{\mathcal{H}_v}$  be the binary prediction and binary prediction-outcome classes of  $\mathcal{H}$ .

Using Lemmas 16 and 17, and since  $d_G(\mathcal{H}) \leq d$ , we know that  $VCdim(\Phi_{\mathcal{H}_v}) \leq VCdim(\mathcal{H}_v) \leq d$ .

In addition, note that:

$$\left| \frac{1}{m} \sum_{i=1}^m \mathbb{I}[h(x_i) = v] - \Pr_{x \sim D_U} [h(x) = v] \right| = \left| \frac{1}{m} \sum_{i=1}^m h_v(x_i) - \Pr_{x \sim D_U} [h_v(x) = 1] \right|,$$

And

$$\left| \frac{1}{m} \sum_{i=1}^m \mathbb{I}[h(x_i) = v, y = 1] - \Pr_{(x,y) \sim D_U} [h(x) = v, y = 1] \right| = \left| \frac{1}{m} \sum_{i=1}^m \phi_{h,v}(x_i, y_1) - \Pr_{(x,y) \sim D_U} [\phi_{h,v}(x, y)] \right|.$$

and the lemma follows directly from Corollary 13.  $\blacksquare$

*Proof.* (Proof of Lemma 19)

Let us denote  $\xi := \psi\epsilon/3$

$$\frac{p_1}{p_2} - \frac{\tilde{p}_1}{\tilde{p}_2} \leq \frac{p_1}{p_2} - \frac{p_1 - \xi}{p_2 + \xi} = \frac{p_1(1 + \xi/p_2)}{p_2(1 + \xi/p_2)} - \frac{p_1 - \xi}{p_2(1 + \xi/p_2)} = \frac{\xi}{p_2(1 + \xi/p_2)} \left[ \frac{p_1}{p_2} + 1 \right]$$

Since  $p_1, \psi \leq p_2$ ,

$$\frac{\xi}{p_2(1 + \xi/p_2)} \left[ \frac{p_1}{p_2} + 1 \right] \leq \frac{\xi}{p_2} \left[ \frac{p_2}{\psi} + \frac{p_2}{\psi} \right] = \frac{2\xi}{\psi} \leq \frac{3\xi}{\psi} = \epsilon.$$

Similarly,

$$\frac{\tilde{p}_1}{\tilde{p}_2} - \frac{p_1}{p_2} \leq \frac{p_1 + \xi}{p_2 - \xi} - \frac{p_1}{p_2} = \frac{p_1 + \xi}{p_2(1 - \xi/p_2)} - \frac{p_1(1 - \xi/p_2)}{p_2(1 - \xi/p_2)} = \frac{\xi}{p_2(1 - \xi/p_2)} \left[ 1 + \frac{p_1}{p_2} \right].$$

Since  $p_1, \psi \leq p_2$ ,

$$\frac{\xi}{p_2(1 - \xi/p_2)} \left[ 1 + \frac{p_1}{p_2} \right] \leq \frac{\xi}{p_2(1 - \xi/\psi)} \left[ \frac{p_2}{\psi} + \frac{p_2}{\psi} \right] = \frac{2\xi}{\psi(1 - \xi/\psi)} = \frac{2\epsilon}{3(1 - \epsilon/3)} \leq \frac{2\epsilon}{3(1 - 1/3)} = \epsilon$$

Thus,

$$\left| \frac{p_1}{p_2} - \frac{\tilde{p}_1}{\tilde{p}_2} \right| \leq \epsilon$$

$\blacksquare$

*Proof.* (Proof of Lemma 20) Let  $P_U$  denote the probability of subpopulation  $U$ :

$$P_U := \Pr_{x \sim D} [x \in U]$$

Using the relative Chernoff bound (Lemma 23) and since  $\mathbb{E}[|S \cap U|] = mP_U$ , we can bound the probability of having a small sample size in  $U$ . Namely, if  $P_U \geq \gamma$ , then:

$$\Pr_D \left[ |S \cap U| \leq \frac{\gamma m}{2} \right] \leq \Pr_D \left[ |S \cap U| \leq \frac{mP_U}{2} \right] \leq e^{-\frac{mP_U}{8}} \leq e^{-\frac{\gamma m}{8}}$$

Thus, for any  $U \in \Gamma_\gamma$ , if  $m \geq \frac{8 \log(\frac{|\Gamma|}{\delta})}{\gamma}$ , then, with probability of at least  $1 - \frac{\delta}{|\Gamma|}$ ,

$$|S \cap U| > \frac{\gamma m}{2}$$

Finally, using the union bound, with probability at least  $1 - \delta$ , for all  $U \in \Gamma_\gamma$ ,

$$|S \cap U| > \frac{\gamma m}{2}$$

$\blacksquare$

*Proof.* (Proof of Theorem 10)

Let  $S = \{(x_1, y_1), \dots, (x_m, y_m)\}$  be a sample of  $m$  labeled examples drawn i.i.d. according to  $D$ , and let  $S_U := \{(x, y) \in S : x \in U\}$  be the samples in  $S$  that belong to subpopulation  $U$ .

Let  $\Gamma_\gamma$  denote the set of all subpopulations  $U \in \Gamma$  that has probability of at least  $\gamma$ :

$$\Gamma_\gamma := \{U \in \Gamma \mid \Pr_{x \sim D}[x \in U] \geq \gamma\}$$

Let us assume the following lower bound on the sample size:

$$m \geq \frac{8 \log\left(\frac{2|\Gamma|}{\delta}\right)}{\gamma}$$

Thus, using Lemma 20, we can bound the probability of having a subpopulation  $U \in \Gamma_\gamma$  with small number of samples. Namely, we know that with probability of at least  $1 - \delta/2$ , for every  $U \in \Gamma_\gamma$ :

$$|S_U| \geq \frac{\gamma m}{2}$$

Next, we would like to show that having a large sample size in  $U$  implies accurate approximation of the calibration error, with high probability, for any interesting category in  $(U, I)$ . For this purpose, let us define  $\epsilon', \delta'$  as:

$$\epsilon' := \frac{\psi \epsilon}{3}$$

$$\delta' := \frac{\delta}{4|\Gamma||\mathcal{Y}|}$$

By using Lemma 18 and since  $d_G(\mathcal{H}) \leq d$ , we know that there exists some constant  $a > 0$ , such that, for any  $v \in \mathcal{Y}$  and any  $U \in \Gamma_\gamma$ , with probability at least  $1 - \delta'$ , a random sample of  $m_1$  examples from  $U$ , where,

$$m_1 \geq a \frac{d + \log(1/\delta')}{\epsilon'^2} = 9a \frac{d + \log\left(\frac{4|\Gamma||\mathcal{Y}|}{\delta}\right)}{\epsilon^2 \psi^2}$$

will have,

$$\forall h \in \mathcal{H} : \left| \frac{1}{m_1} \sum_{x' \in S_U} \mathbb{I}[h(x') = v] - \Pr[h(x) = v \mid x \in U] \right| \leq \epsilon' = \frac{\psi \epsilon}{3}$$

By using Lemma 18 and since  $d_G(\mathcal{H}) \leq d$ , we know that for any  $v \in \mathcal{Y}$  and any  $U \in \Gamma_\gamma$ , with probability at least  $1 - \delta'$ , a random sample of  $m_2$  labeled examples from  $U \times \{0, 1\}$ , where,

$$m_2 \geq a \frac{d + \log(1/\delta')}{\epsilon'^2} = 9a \frac{d + \log\left(\frac{4|\Gamma||\mathcal{Y}|}{\delta}\right)}{\epsilon^2 \psi^2}$$

will have,

$$\forall h \in \mathcal{H} : \left| \frac{1}{m_2} \sum_{(x', y') \in S_U} \mathbb{I}[h(x') = v, y' = 1] - \Pr[h(x) = v, y = 1 \mid x \in U] \right| \leq \epsilon' = \frac{\psi \epsilon}{3}$$

Let us define the constant  $a'$  in a manner that sets an upper bound on both  $m_1$  and  $m_2$ :

$$a' := 18a$$

and let  $m'$  be that upper bound:

$$m' := a' \frac{d + \log\left(\frac{|\Gamma||\mathcal{Y}|}{\delta}\right)}{\psi^2 \epsilon^2} \geq \max(m_1, m_2)$$

Then, by the union bound, if for all subpopulation  $U \in \Gamma_\gamma$ ,  $|S_U| \geq m'$ , then, with probability at least  $1 - 2|\Gamma||\mathcal{Y}|\delta' = 1 - \frac{\delta}{2}$ :

$$\forall h \in \mathcal{H}, \forall U \in \Gamma_\gamma, \forall v \in \mathcal{Y} :$$

$$\left| \frac{1}{|S_U|} \sum_{(x', y') \in S_U} \mathbb{I}[h(x') = v] - \Pr[h(x) = v \mid x \in U] \right| \leq \frac{\psi\epsilon}{3}$$

$$\forall h \in \mathcal{H}, \forall U \in \Gamma_\gamma, \forall v \in \mathcal{Y} :$$

$$\left| \frac{1}{|S_U|} \sum_{(x', y') \in S_U} \mathbb{I}[h(x') = v, y' = 1] - \Pr[h(x) = v, y = 1 \mid x \in U] \right| \leq \frac{\psi\epsilon}{3}$$

Let us choose the sample size  $m$  as follows:

$$m := \frac{2m'}{\gamma} = 2a \frac{d + \log\left(\frac{|\Gamma||\mathcal{Y}|}{\delta}\right)}{\psi^2 \epsilon^2 \gamma}$$

Recall that with probability at least  $1 - \delta/2$ , for every  $U \in \Gamma_\gamma$ :

$$|S_U| \geq \frac{\gamma m}{2} = m'$$

Thus, using the union bound once again, with probability at least  $1 - \delta$ :

$$\forall h \in \mathcal{H}, \forall U \in \Gamma_\gamma, \forall v \in \mathcal{Y} :$$

$$\left| \frac{1}{|S_U|} \sum_{x' \in S_U} \mathbb{I}[h(x') = v] - \Pr[h(x) = v \mid x \in U] \right| \leq \frac{\psi\epsilon}{3}$$

$$\forall h \in \mathcal{H}, \forall U \in \Gamma_\gamma, \forall v \in \mathcal{Y} :$$

$$\left| \frac{1}{|S_U|} \sum_{(x', y') \in S_U} \mathbb{I}[h(x') = v, y' = 1] - \Pr[h(x) = v, y = 1 \mid x \in U] \right| \leq \frac{\psi\epsilon}{3}$$

To conclude the theorem, we need show that having  $\psi\epsilon/3$  approximation to the terms described above, implies accurate approximation to the calibration error. For this purpose, let us denote:

$$\begin{aligned} p_1(h, U, v) &:= \Pr[h(x) = v, y = 1 \mid x \in U] \\ p_2(h, U, v) &:= \Pr[h(x) = v \mid x \in U] \\ \tilde{p}_1(h, U, v) &:= \frac{1}{|S_U|} \sum_{(x', y') \in S_U} \mathbb{I}[h(x') = v, y' = 1] \\ \tilde{p}_2(h, U, v) &:= \frac{1}{|S_U|} \sum_{x' \in S_U} \mathbb{I}[h(x') = v] \end{aligned}$$

Then, with probability at least  $1 - \delta$ :

$$\forall h \in \mathcal{H}, \forall U \in \Gamma_\gamma, \forall v \in \mathcal{Y} : \left| \tilde{p}_2(h, U, v) - p_2(h, U, v) \right| \leq \frac{\psi\epsilon}{3}$$

$$\forall h \in \mathcal{H}, \forall U \in \Gamma_\gamma, \forall v \in \mathcal{Y} : \left| \tilde{p}_1(h, U, v) - p_1(h, U, v) \right| \leq \frac{\psi\epsilon}{3}$$

Using Lemma 19, for all  $h \in \mathcal{H}$ ,  $U \in \Gamma_\gamma$  and  $v \in \mathcal{Y}$ , if  $p_2(h, U, v) \geq \psi$ , then:

$$\left| \frac{p_1(h, U, v)}{p_2(h, U, v)} - \frac{\tilde{p}_1(h, U, v)}{\tilde{p}_2(h, U, v)} \right| \leq \epsilon$$

Thus, since

$$c(h, U, \{v\}) = \frac{p_1(h, U, v)}{p_2(h, U, v)} - v$$

$$\hat{c}(h, U, \{v\}, S) = \frac{\tilde{p}_1(h, U, v)}{\tilde{p}_2(h, U, v)} - v$$

then with probability at least  $1 - \delta$ :

$$\forall h \in \mathcal{H}, \forall U \in \Gamma, \forall v \in \mathcal{Y} : \quad \Pr[x \in U] \geq \gamma, \Pr[h(x) = v \mid x \in U] \geq \psi \Rightarrow |c(h, U, \{v\}) - \hat{c}(h, U, \{v\}, S)| \leq \epsilon$$

■

## D Proofs for Section 6

*Proof.* (Proof of Theorem 11) Let  $\mathcal{X} = U \cup \{x^2\}$  where  $U = \{x^0, x^1\}$  and  $x^0 \neq x^1$ . Let  $H = \{h\}$ , where

$$h(x) = \begin{cases} \frac{1}{2} + \epsilon & x = x^0 \\ 0 & \text{else.} \end{cases}$$

Let  $\Gamma = \{U, \{x^2\}\}$ . Let  $D \in \{D_1, D_2\}$  where

$$D_1(x, y) = \begin{cases} (1/2 + \epsilon)\psi\gamma & (x, y) = (x^0, 1) \\ (1/2 - \epsilon)\psi\gamma & (x, y) = (x^0, 0) \\ (1 - \psi)\gamma & (x, y) = (x^1, 0) \\ 1 - \gamma & (x, y) = (x^2, 0) \end{cases}$$

and

$$D_2(x, y) = \begin{cases} (1/2 + \epsilon)\psi\gamma & (x, y) = (x^0, 0) \\ (1/2 - \epsilon)\psi\gamma & (x, y) = (x^0, 1) \\ (1 - \psi)\gamma & (x, y) = (x^1, 0) \\ 1 - \gamma & (x, y) = (x^2, 0) \end{cases}$$

Now we will show a reduction to coin tossing:

Consider two biased coins. The first coin has a probability of  $r_1 = 1/2 + \epsilon$  for heads and the second has a probability of  $r_2 = 1/2 - \epsilon$  for heads. We know that in order to distinguish between the two with confidence  $\geq 1 - \delta_1$ , we need at least  $C \frac{\ln(\frac{1}{\delta_1})}{\epsilon^2}$  samples.

Since

$$\Pr_{(x,y) \sim D} [x \in U] = \Pr_{(x,y) \sim D} [x \neq x^2] = \gamma$$

the first condition for multicalibration holds. Now, we use another property of our “tailor-made” distribution  $D$  and single predictor  $h$ , which is  $\{x \in \mathcal{X} : h(x) = \frac{1}{2} + \epsilon\} = \{x \in \mathcal{X} : h(x) = \frac{1}{2} + \epsilon, x \in U\} = \{x_0\}$ , to get the second condition:

$$\Pr_D[h(x) = 1/2 + \epsilon \mid x \in U] = \Pr_D[x = x^0 \mid x \in U] = \frac{\psi\gamma}{\gamma} = \psi,$$

and that

$$\Pr_D[y = 1 \mid h(x) = \frac{1}{2} + \epsilon, x \in U] = \Pr_D[y = 1 \mid x = x^0]$$

is either  $1/2 + \epsilon$  (if  $D = D_1$ ) or  $1/2 - \epsilon$  (in case  $D = D_2$ ) (recall that  $D \in \{D_1, D_2\}$ ).

Now, if  $H$  has the multicalibration uniform convergence property with a sample  $S = (x_i, y_i)_{i=1}^m$  of size  $m$ , and if

$$\sum_{i=1}^m \frac{\mathbb{I}[y_i = 1, h(x_i) = 1/2 + \epsilon, x_i \in U]}{\sum_{j=1}^m \mathbb{I}[h(x_j) = 1/2 + \epsilon, x_j \in U]} = \sum_{i=1}^m \frac{\mathbb{I}[y_i = 1, x_i = x^0]}{\sum_{j=1}^m \mathbb{I}[x_j = x^0]} > \frac{1}{2}$$

holds, then

$$\Pr[y = 1 \mid h(x) = \frac{1}{2} + \epsilon, x \in U] = \frac{1}{2} + \epsilon$$



holds w.p.  $1 - \delta_1$  (from the definition of multicalibration uniform convergence).

Let us assume by contradiction that we can get multicalibration uniform convergence with  $m = \frac{C}{\epsilon^2 \psi \gamma} - \frac{k}{\psi \gamma} < \frac{C}{\epsilon^2 \psi \gamma}$  for some constant  $k = \Omega(1)$ .

Let  $m_0$  denote the random variable that represents the number of samples in  $S$  such that  $x_i = x^0$  (i.e.,  $h(x_i) = 1/2 + \epsilon$ ). Hence,  $\mathbb{E}[m_0] = \gamma \cdot \psi \cdot m = \frac{C}{\epsilon^2} - k$ .

From Hoeffding's inequality,

$$\Pr[m^0 \geq \frac{C}{\epsilon^2}] = \Pr[m^0 - \underbrace{(\frac{C}{\epsilon^2} - k)}_{\mathbb{E}[m_0]} \geq k] \leq e^{-2mk^2}.$$

Let  $\delta_2$  be the parameter that holds  $e^{-2mk^2} \leq \delta_2$ , and let  $\delta := \delta_1 + \delta_2$ . Then we get that with probability  $> (1 - \delta_1)(1 - \delta_2) > 1 - \delta_1 - \delta_2 = 1 - \delta$  we can distinguish between the two coins with less than  $\frac{C}{\epsilon^2}$  samples, which is a contradiction. ■
